# Supplementary material
Source: Springer Nature journal article supplement (https://www.springermedizin.de/resource/supplementary/12985_2009_795_MOESM2_ESM.pdf/9609208)

**A****Standard Curve**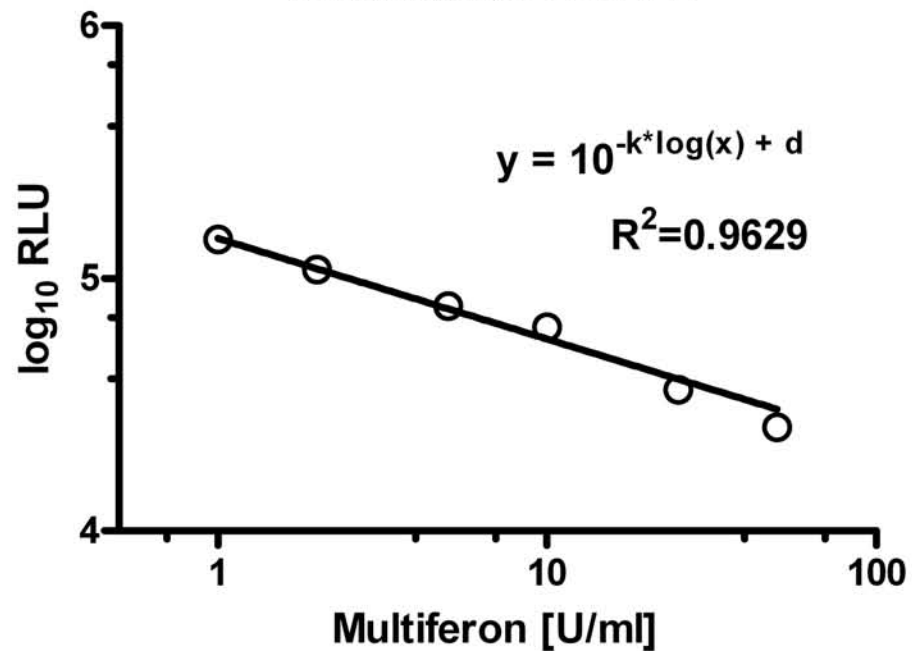**B**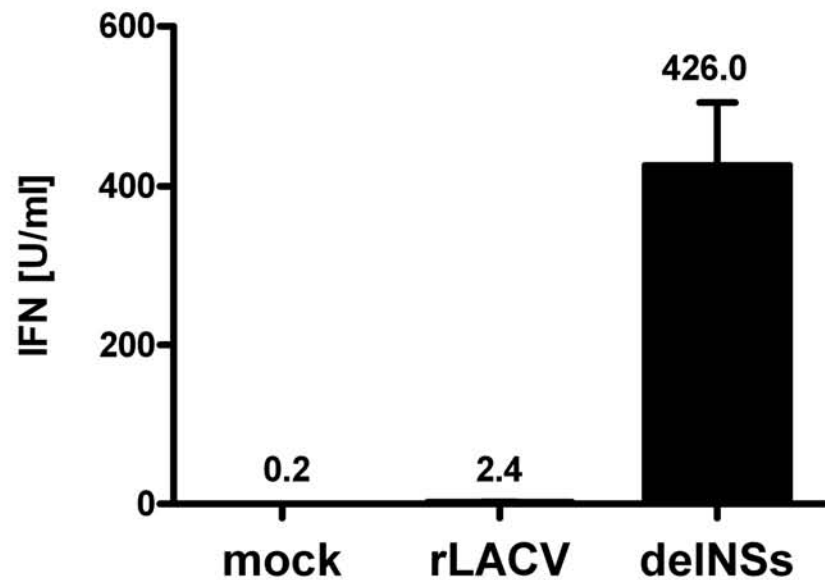

Supplement: MOESM2 [file 9609208]
